# Supplementary material
Source: publisher site journal article supplement (https://www.dovepress.com/article/375000)
Supplement: Supplementary file 1 [file get_supplementary_file.php]

**Supplementary Table S1** Association of Genetic Mutations with Clinical Features of Elderly AML Patients

| Mutation | | FAB classification  M1/M2/M4/M5  a | Chromosome karyotype  normal/abnormalb | Cytogenetic risk  favorable/ intermediate/higha | Origin of disease  de novo AML/s-AML/t-AMLa | Response to chemotherapy  CR /NRa |
| --- | --- | --- | --- | --- | --- | --- |
| TET2 | mutant | 0/9/1/8 | 15/9 | 10/3/11 | 21/2/1 | 11/13 |
|  | wild | 2/26/6/18 | 43/23 | 30/20/16 | 61/5/0 | 36/30 |
|  | value | 0.678 | 0.816 | 0.083 | 0.259 | 0.464 |
| DNMT3A | mutant | 0/4/2/13 | 16/7 | 10/6/7 | 21/2/0 | 7/16 |
|  | wild | 2/31/5/13 | 42/25 | 30/17/20 | 61/5/1 | 40/27 |
|  | value | **0.007** | 0.552 | 0.994 | 0.732 | **0.015** |
| IDH2 | mutant | 1/10/1/5 | 17/5 | 10/5/7 | 20/1/1 | 11/11 |
|  | wild | 1/25/6/21 | 41/27 | 30/18/20 | 62/6/0 | 36/32 |
|  | value | 0.613 | 0.148 | 0.937 | 0.196 | 0.81 |
| NPM1 | mutant | 1/8/1/8 | 21/1 | 20/2/0 | 21/1/0 | 7/15 |
|  | wild | 1/27/6/18 | 37/31 | 20/21/27 | 6/1/61 | 40/28 |
|  | value | 0.678 | **<0.001** | **<0.001** | 0.589 | **0.028** |
| FLT3-ITD | mutant | 0/7/2/6 | 16/1 | 9/5/3 | 17/0/0 | 6/11 |
|  | wild | 2/28/5/20 | 42/31 | 31/18/24 | 65/7/1 | 41/32 |
|  | value | 0.839 | **0.005** | 0.466 | 0.171 | 0.121 |
| CEBPA | mutant | 1/9/2/1 | 8/6 | 12/1/1 | 13/1/0 | 9/5 |
|  | wild | 1/26/5/25 | 50/26 | 28/22/26 | 69/6/1 | 38/38 |
|  | value | 0.083 | 0.751 | **0.002** | 0.838 | 0.325 |
| ASXL1 | mutant | 0/3/1/4 | 7/6 | 2/0/11 | 11/2/0 | 5/8 |
|  | wild | 2/32/6/22 | 51/26 | 38/23/16 | 71/5/1 | 42/35 |
|  | value | 0.802 | 0.582 | **<0.001** | 0.52 | 0.283 |
| IDH1 | mutant | 0/5/0/1 | 9/4 | 4/5/4 | 11/2/0 | 7/6 |
|  | wild | 2/30/7/25 | 49/28 | 36/18/23 | 71/5/1 | 40/37 |
|  | value | 0.288 | 0.939 | 0.452 | 0.52 | 0.899 |
| SRSF2 | mutant | 1/6/0/2 | 7/6 | 4/3/6 | 10/3/0 | 6/7 |
|  | wild | 1/29/7/24 | 51/26 | 36/20/21 | 72/4/1 | 41/36 |
|  | value | 0.196 | 0.582 | 0.385 | 0.138 | 0.636 |
| BCOR | mutant | 0/1/0/6 | 9/2 | 2/5/4 | 8/3/0 | 7/4 |
|  | wild | 2/34/7/20 | 49/30 | 38/18/23 | 74/4/1 | 40/39 |
|  | value | **0.048** | 0.343 | 0.121 | 0.089 | 0.419 |
| TP53 | mutant | 0/4/0/2 | 5/5 | 0/0/10 | 8/2/0 | 3/7 |
|  | wild | 2/31/7/24 | 53/27 | 40/23/17 | 74/5/1 | 44/36 |
|  | value | 0.578 | 0.508 | **<0.001** | 0.371 | 0.184 |
| NRAS | mutant | 0/1/1/5 | 5/3 | 6/2/0 | 7/1/0 | 1/7 |
|  | wild | 2/34/6/21 | 53/29 | 34/21/27 | 75/6/1 | 46/36 |
|  | value | 0.186 | 1 | **0.037** | 0.813 | **0.025** |
| RUNX1 | mutant | 0/1/0/4 | 7/1 | 0/0/8 | 6/2/0 | 6/2 |
|  | wild | 2/34/7/22 | 51/31 | 40/23/19 | 76/6/1 | 41/41 |
|  | value | 0.202 | 0.251 | **<0.001** | 0.261 | 0.177 |
| U2AF1 | mutant | 0/0/0/4 | 2/5 | 0/2/5 | 6/1/0 | 2/5 |
|  | wild | 2/35/7/22 | 56/27 | 40/21/22 | 76/6/1 | 45/38 |
|  | value | **0.039** | 0.098 | **0.008** | 0.769 | 0.252 |
| BCORL1 | mutant | 0/0/0/5 | 6/1 | 1/2/4 | 5/2/0 | 5/2 |
|  | wild | 2/35/7/21 | 52/31 | 39/21/23 | 77/5/1 | 42/41 |
|  | value | **0.014** | 0.416 | 0.165 | 0.206 | 0.438 |
| WT1 | mutant | 0/2/1/3 | 4/3 | 4/1/2 | 7/0/0 | 5/2 |
|  | wild | 2/33/6/23 | 54/29 | 36/22/25 | 75/7/1 | 42/41 |
|  | value | 0.734 | 0.993 | 0.704 | 0.507 | 0.438 |
| FLT3-TKD | mutant | 0/1/1/5 | 4/3 | 3/1/3 | 6/1/0 | 3/4 |
|  | wild | 2/34/6/21 | 54/29 | 37/22/24 | 76/6/1 | 44/39 |
|  | value | 0.186 | 0.993 | 0.663 | 0.769 | 0.705 |

**Abbreviations:** FAB, French-American-British; s-AML, secondary AML; t-AML, therapy-related AML; CR, complete remission; NR, no response; a, Fisher's exact test was used for the evaluations of the difference between groups; b, Chi-squared test was used for the evaluations of the difference between groups; Bold text, the p value with statistical difference.

**Supplementary Table S2** Association of Genetic Mutations with Immunophenotype of Elderly AML Patients

| Mutation | | CD7+/CD7- | CD11b+/CD11b- | CD13+/CD13- | CD14+/CD14- | CD19+/CD19- | CD33+/CD33- | CD34+/CD34- | CD38+/CD38- | CD56+/CD56- | CD64+/CD64- | CD117+/CD117- | CD123+/CD123- | MPO+/MPO- |
| --- | --- | --- | --- | --- | --- | --- | --- | --- | --- | --- | --- | --- | --- | --- |
| TET2 | mutant | 8/16 | 5/19 | 23/1 | 1/23 | 0/24 | 20/4 | 15/9 | 19/5 | 6/18 | 11/13 | 22/2 | 10/14 | 18/6 |
|  | wild | 17/49 | 8/58 | 1/60 | 6/60 | 3/63 | 60/6 | 50/16 | 49/17 | 26/40 | 22/44 | 62/4 | 28/38 | 43/23 |
|  | value | 0.478 | 0.484 | 0.744 | 0.744 | 0.562 | 0.527 | 0.214 | 0.631 | 0.207 | 0.277 | 1 | 0.949 | 0.377 |
| DNMT3A | mutant | 7/16 | 6/17 | 22/1 | 4/19 | 0/23 | 23/0 | 14/9 | 17/6 | 11/12 | 11/12 | 20/3 | 14/9 | 16/7 |
|  | wild | 18/49 | 7/60 | 61/6 | 3/64 | 3/64 | 57/10 | 51/16 | 51/16 | 21/46 | 22/45 | 64/3 | 24/43 | 45/22 |
|  | value | 0.742 | 0.087 | 0.794 | 0.068 | 0.567 | 0.059 | 0.159 | 0.832 | 0.154 | 0.198 | 0.171 | **0.036** | 0.832 |
| IDH2 | mutant | 1/21 | 2/20 | 19/3 | 2/20 | 0/22 | 21/1 | 12/10 | 17/5 | 7/15 | 8/14 | 21/1 | 13/9 | 17/5 |
|  | wild | 24/44 | 11/57 | 64/4 | 5/63 | 3/65 | 59/9 | 53/15 | 51/17 | 25/43 | 25/43 | 63/5 | 25/43 | 44/24 |
|  | value | **0.005** | 0.508 | 0.355 | 1 | 1 | 0.441 | **0.033** | 0.829 | 0.674 | 0.973 | 1 | 0.065 | 0.273 |
| NPM1 | mutant | 2/20 | 8/14 | 18/4 | 4/18 | 0/22 | 22/0 | 2/20 | 21/1 | 10/12 | 12/10 | 18/4 | 13/9 | 17/5 |
|  | wild | 23/45 | 5/63 | 65/3 | 3/65 | 3/65 | 58/10 | 63/5 | 47/21 | 22/46 | 21/47 | 66/2 | 25/43 | 44/24 |
|  | value | **0.024** | **0.002** | 0.058 | 0.058 | 1 | 0.111 | **<0.001** | **0.012** | 0.264 | **0.045** | **0.03** | 0.065 | 0.273 |
| FLT3-ITD | mutant | 3/14 | 3/14 | 16/1 | 3/14 | 0/17 | 15/2 | 8/9 | 13/4 | 6/11 | 10/7 | 16/1 | 12/5 | 11/6 |
|  | wild | 22/51 | 10/63 | 67/6 | 4/69 | 3/70 | 65/8 | 57/16 | 55/18 | 26/47 | 23/50 | 68/5 | 26/47 | 50/23 |
|  | value | 0.379 | 0.706 | 1 | 0.706 | 1 | 1 | **0.016** | 1 | 0.98 | **0.035** | 1 | **0.009** | 0.763 |
| CEBPA | mutant | 6/8 | 0/14 | 14/0 | 0/14 | 0/14 | 14/0 | 13/1 | 11/3 | 3/11 | 7/7 | 14/0 | 5/9 | 10/4 |
|  | wild | 19/57 | 13/63 | 69/7 | 7/69 | 3/73 | 66/10 | 52/24 | 57/19 | 29/47 | 26/50 | 70/6 | 33/43 | 51/25 |
|  | value | 0.2 | 0.207 | 0.59 | 0.59 | 1 | 0.351 | 0.101 | 1 | 0.363 | 0.26 | 0.585 | 0.592 | 1 |
| ASXL1 | mutant | 4/9 | 1/12 | 12/1 | 1/12 | 0/13 | 9/4 | 11/2 | 10/3 | 1/12 | 2/11 | 12/1 | 3/10 | 6/7 |
|  | wild | 21/56 | 12/65 | 71/6 | 6/71 | 3/74 | 71/6 | 54/23 | 58/19 | 31/46 | 31/46 | 72/5 | 35/42 | 55/22 |
|  | value | 0.749 | 0.638 | 1 | 1 | 1 | **0.035** | 0.503 | 1 | **0.028** | 0.121 | 1 | 0.131 | 0.107 |
| IDH1 | mutant | 2/11 | 0/13 | 13/0 | 0/13 | 0/13 | 9/4 | 8/5 | 10/3 | 4/9 | 2/11 | 13/0 | 1/12 | 9/4 |
|  | wild | 23/54 | 13/64 | 70/7 | 7/70 | 3/74 | 71/6 | 57/20 | 58/19 | 28/49 | 31/46 | 71/6 | 37/40 | 52/25 |
|  | value | 0.503 | 0.201 | 0.587 | 0.587 | 1 | **0.035** | 0.34 | 1 | 0.765 | 0.121 | 0.587 | **0.006** | 1 |
| SRSF2 | mutant | 5/8 | 0/13 | 11/2 | 0/13 | 1/12 | 9/4 | 12/1 | 8/5 | 4/9 | 2/11 | 13/0 | 5/8 | 9/4 |
|  | wild | 20/57 | 13/64 | 72/5 | 7/70 | 2/75 | 71/6 | 53/24 | 60/17 | 28/49 | 31/46 | 71/6 | 33/44 | 52/25 |
|  | value | 0.34 | 0.201 | 0.266 | 0.587 | 0.377 | **0.035** | 0.102 | 0.293 | 0.765 | 0.121 | 0.587 | 0.767 | 1 |
| BCOR | mutant | 5/6 | 1/10 | 11/0 | 2/9 | 0/11 | 8/3 | 11/0 | 9/2 | 3/8 | 3/8 | 11/0 | 5/6 | 6/5 |
|  | wild | 20/59 | 12/67 | 72/7 | 5/74 | 3/76 | 72/7 | 54/25 | 59/20 | 29/50 | 30/49 | 73/6 | 33/46 | 55/24 |
|  | value | 0.171 | 1 | 0.591 | 0.203 | 1 | 0.32 | **0.031** | 1 | 0.74 | 0.74 | 1 | 1 | 0.323 |
| TP53 | mutant | 3/7 | 1/9 | 9/1 | 0/10 | 0/10 | 10/0 | 10/0 | 7/3 | 5/5 | 2/8 | 10/0 | 3/7 | 6/4 |
|  | wild | 22/58 | 12/68 | 74/6 | 7/73 | 3/77 | 70/10 | 55/25 | 61/19 | 27/53 | 31/49 | 74/6 | 35/45 | 55/25 |
|  | value | 1 | 1 | 0.575 | 1 | 1 | 0.595 | 0.056 | 0.702 | 0.319 | 0.315 | 1 | 0.509 | 0.721 |
| NRAS | mutant | 2/6 | 5/3 | 7/1 | 3/5 | 0/8 | 8/0 | 3/5 | 7/1 | 5/3 | 4/4 | 5/3 | 3/5 | 4/4 |
|  | wild | 23/59 | 8/74 | 76/6 | 4/78 | 3/79 | 72/10 | 62/20 | 61/21 | 27/55 | 29/53 | 79/3 | 35/47 | 57/25 |
|  | value | 1 | **0.001** | 0.491 | 0.014 | 1 | 0.59 | 0.035 | 0.674 | 0.127 | 0.458 | 0.008 | 1 | 0.266 |
| RUNX1 | mutant | 2/6 | 0/8 | 8/0 | 1/7 | 0/8 | 5/3 | 8/0 | 5/3 | 1/7 | 3/5 | 7/1 | 4/4 | 4/4 |
|  | wild | 23/59 | 13/69 | 75/7 | 6/76 | 3/79 | 75/7 | 57/25 | 63/19 | 31/51 | 30/52 | 77/5 | 34/48 | 57/25 |
|  | value | 1 | 0.597 | 1 | 0.491 | 1 | **0.042** | 1 | 0.399 | 0.251 | 1 | 0.438 | 0.717 | 0.266 |
| U2AF1 | mutant | 2/5 | 1/6 | 6/1 | 0/7 | 0/7 | 5/2 | 7/0 | 5/2 | 2/5 | 1/6 | 7/0 | 1/6 | 1/6 |
|  | wild | 23/60 | 12/71 | 77/6 | 7/76 | 3/80 | 75/8 | 58/25 | 63/20 | 30/53 | 32/51 | 77/6 | 37/46 | 60/23 |
|  | value | 1 | 1 | 0.444 | 1 | 1 | 0.173 | 0.184 | 1 | 1 | 0.416 | 1 | 0.231 | **0.004** |
| BCORL1 | mutant | 3/4 | 1/6 | 7/0 | 2/5 | 0/7 | 5/2 | 7/0 | 6/1 | 2/5 | 3/4 | 7/0 | 4/3 | 4/3 |
|  | wild | 22/61 | 12/71 | 76/7 | 5/78 | 3/80 | 75/8 | 58/25 | 62/21 | 30/53 | 30/53 | 77/6 | 34/49 | 57/26 |
|  | value | 0.392 | 1 | 1 | 0.091 | 1 | 0.173 | 0.184 | 1 | 1 | 0.704 | 1 | 0.45 | 0.677 |
| WT1 | mutant | 1/6 | 0/7 | 7/0 | 1/6 | 0/7 | 7/0 | 6/1 | 5/2 | 0/7 | 4/3 | 7/0 | 6/1 | 6/1 |
|  | wild | 24/59 | 13/70 | 76/7 | 6/77 | 3/80 | 73/10 | 59/24 | 63/20 | 32/51 | 29/54 | 77/6 | 32/51 | 55/28 |
|  | value | 0.668 | 0.587 | 1 | 0.444 | 1 | 1 | 0.668 | 1 | **0.048** | 0.255 | 1 | **0.039** | 0.421 |
| FLT3-TKD | mutant | 1/6 | 2/5 | 6/1 | 0/7 | 0/7 | 7/0 | 6/1 | 4/3 | 3/4 | 3/4 | 6/1 | 5/2 | 5/2 |
|  | wild | 24/59 | 11/72 | 77/6 | 7/76 | 3/80 | 73/10 | 59/24 | 64/19 | 29/54 | 30/53 | 78/5 | 33/50 | 56/27 |
|  | value | 0.668 | 0.266 | 0.444 | 1 | 1 | 1 | 0.668 | 0.355 | 0.696 | 0.704 | 0.394 | 0.128 | 1 |

**Abbreviations:** +, expressed; -, not expressed; Bold text, the p value with statistical difference. Chi-squared test was used for each comparison.
